# Supplementary material for: On-Hours Compared to Off-Hours Pediatric Extracorporeal Life Support Initiation in the United States Between 2009 and 2018—An Analysis of the Extracorporeal Life Support Organization Registry
Source: PubMed Central journal article supplement — Crit Care Explor. 2022 May 16;4(5):e0698. doi: 10.1097/CCE.0000000000000698 (PMC9113205; doi:10.1097/cce.0000000000000698), 2022-05-16
Supplement: cc9-4-e0698-s001.pdf [file cc9-4-e0698-s001.pdf]

# ECLS Registry Form

## Extracorporeal Life Support Organization (ELSO)

Please refer to the ELSO Registry Data Definitions Document for Details

Unique ID: \_\_\_\_\_ Birth Date: \_\_\_\_\_  
(include time for neonates)

Sex: \_\_\_\_\_ (M, F, unknown) Race: \_\_\_\_\_ (Asian, Black, Hispanic, White, Middle Eastern or North African, Native American, Native Pacific Islander, Other, Unknown)

### Run Information

Date/Time On: \_\_\_\_\_ Date/Time Off: \_\_\_\_\_ Support Type:  Pulmonary  
 Cardiac  
 ECPR  
 Run No: \_\_\_\_\_  
 Weight (kg): \_\_\_\_\_ Height (cm): \_\_\_\_\_

Intubation:  Yes, Date Known: \_\_\_\_\_  
 Pre-existing Trach: \_\_\_\_\_  
 Yes, Date Estimated: \_\_\_\_\_  
 Yes, Date Unknown  
 No

Invasive Ventilation:  Yes, New Date/Time: \_\_\_\_\_  
 Pre-existing Ventilation: \_\_\_\_\_  
 Yes, Date/Time Estimated: \_\_\_\_\_  
 Yes, Date/Time unknown  
 No

### Neonatal patients only:

Birth weight (kg): \_\_\_\_\_ Gestational age: \_\_\_\_\_  
 Apgar (1 min): \_\_\_\_\_ Delivery: \_\_\_\_\_ (Vaginal, ER or Elective C-section, Unknown)  
 Apgar (5 min): \_\_\_\_\_ Maternal age: \_\_\_\_\_  
 CDH:  Y  N  Unknown CDH Prenatal diagnosis:  Y  N  Unknown  
 CDH Side: \_\_\_\_\_ (Right, Left, Bilateral, Unknown)  
 Repair: \_\_\_\_\_ (None, Pre-ECLS, On ECLS, Post-ECLS)

### Pre-ECLS Assessment

#### ABG: Closest to/before ECLS, no more than 6 hours before ECLS

#### Vent Settings: Closest to/before ECLS, no more than 6 hours before ECLS

Date/Time: \_\_\_\_\_  
 FiO2 (at ABG draw): \_\_\_\_\_ (%)  
 Lactate: \_\_\_\_\_  
 pH: \_\_\_\_\_ Unknown?   
 PaCO2: \_\_\_\_\_  
 PaO2: \_\_\_\_\_  
 HCO3: \_\_\_\_\_ Unknown?   
 SaO2(%): \_\_\_\_\_  
 SpO2 (%): \_\_\_\_\_

No Ventilator in use:   
 Date/Time: \_\_\_\_\_  
 Vent Type: \_\_\_\_\_  
 Rate/Hz: \_\_\_\_\_  
 PIP/Ampl: \_\_\_\_\_  
 PEEP: \_\_\_\_\_  
 MAP: \_\_\_\_\_  
 Hand bagging:  Y  N  Unknown  
(Select if hand bagged beginning in the 6hrs pre ECLS AND continuing to the time of cannulation)

### Hemodynamics (Closest to and before ECLS start, ideally no more than 6 hours before ECLS start)

Date/Time: \_\_\_\_\_ SBP Unknown?   
 BP: \_\_\_\_\_ SvO2: \_\_\_\_\_ PCWP: \_\_\_\_\_  
     Systolic      Diastolic      Mean  
 PAP: \_\_\_\_\_ Cl: \_\_\_\_\_  
     Systolic      Diastolic      Mean

## Pre ECLS Support

Hospital Admit Date/Time: \_\_\_\_\_

Transported on ECMO     Transported not on ECMO     Not Transported     Unknown

Pre-ECLS cardiac arrest:     Y     N     Unknown

Bridge to transplant:     Y     N     Unknown

Is Trauma the underlying reason for ECLS?     Y     N     Unknown

## Mechanical Cardiac Support (Select those used or in place within 24 hours pre ECLS)

Berlin Heart     BiVAD     Cardiac pacemaker     Cardiopulmonary bypass (CPB)     Intra-aortic balloon     LVAD  
 Perc Ventricular Assist Device     RVAD

## Renal, Pulmonary and Other Support (Select those used or in place within 24 hours pre ECLS)

Inhaled Anesthetic     Inhaled Epoprostenol (>6 hours)     Inhaled Nitric oxide (>6 hours)     Liquid ventilation     Plasmapheresis  
 Prone Positioning (>16 hours)     Renal Replacement Therapy     Surfactant     Therapeutic Hypothermia < 35 degrees C

## Medications Excluding Vasoactives (Select those used or in place within 24 hours pre ECLS)

Alprostadil     IV Bicarbonate     Epoprostenol (all synthetic prostacyclin analogues)     Narcotics     Neuromuscular blockers  
 Sildenafil     Systemic Steroids     THAM

## Vasoactive Infusions (Select those used within 24 hours AND continuously for 6 hours pre ECLS)

Dobutamine     Dopamine     Enoximone     Epinephrine     Esmolol     Levosimendan     Metaraminol     Metoprolol  
 Milrinone     Nicardipine     Nitroglycerin     Nitroprusside     Norepinephrine     Phenylephrine     Tolazoline     Vasopressin

## ECLS Assessment

### Arterial Blood Gas

### Ventilator Settings

Closest to 24 hours after ECLS start, but no less than 18 hours and not more than 30 hours after ECLS start

Date/Time: \_\_\_\_\_  
FiO<sub>2</sub> (at ABG draw): \_\_\_\_\_ (%)  
Lactate: \_\_\_\_\_  
pH: \_\_\_\_\_ Unknown?   
PaCO<sub>2</sub>: \_\_\_\_\_  
PaO<sub>2</sub>: \_\_\_\_\_  
HCO<sub>3</sub>: \_\_\_\_\_ Unknown?   
SaO<sub>2</sub>(%): \_\_\_\_\_  
SpO<sub>2</sub> (%): \_\_\_\_\_

No Ventilator in use:   
Date/Time: \_\_\_\_\_  
Vent Type: \_\_\_\_\_  
Rate/Hz: \_\_\_\_\_  
PIP/Ampl: \_\_\_\_\_  
PEEP: \_\_\_\_\_  
MAP: \_\_\_\_\_  
Hand bagging:  Y     N     Unknown

## Hemodynamics (Closest to 24 hours after ECLS start, but no less than 18 hours and not more than 30 hours after ECLS start)

Date/Time: \_\_\_\_\_ (Select option if SBP/DBP is unavailable or unknown)

BP: \_\_\_\_\_    \_\_\_\_\_    \_\_\_\_\_    SvO<sub>2</sub>: \_\_\_\_\_    PCWP: \_\_\_\_\_  
         Systolic                      Diastolic                      Mean

PAP: \_\_\_\_\_    \_\_\_\_\_    \_\_\_\_\_    CI: \_\_\_\_\_  
         Systolic                      Diastolic                      Mean

## Blood Pump Flow Rates (L/min)

Pump flow at 4 hours: \_\_\_\_\_    Pump flow at 24 hours: \_\_\_\_\_

## ECLS Care

### Unit Where Majority of ECLS Care Received

Adult Medicine ICU  
  Adult Surgical ICU  
  Adult Cardiac ICU  
  Adult Cardiovascular ICU  
  ECLS ICU  
  Emergency Department  
 Mixed ICU  
  Neonatal ICU  
  Pediatric ICU  
  Pediatric Cardiac ICU  
  Operating Room/Cath Lab  
 ➔ Initiated for procedure? Yes No

### Nutrition and Mobility

Enteral Feeding Date/Time (started and continued for at least 2 days) \_\_\_\_\_

| Level of Mobilization at day 7 of ECLS (>8 years)                      | Maximum Level Achieved During ECLS (>8 years)                          |
|------------------------------------------------------------------------|------------------------------------------------------------------------|
| <input type="checkbox"/> 0 Nothing (lying in bed)                      | <input type="checkbox"/> 0 Nothing (lying in bed)                      |
| <input type="checkbox"/> 1 Sitting in bed, exercises in bed            | <input type="checkbox"/> 1 Sitting in bed, exercises in bed            |
| <input type="checkbox"/> 2 Passively moved to chair (no standing)      | <input type="checkbox"/> 2 Passively moved to chair (no standing)      |
| <input type="checkbox"/> 3 Sitting over edge of bed                    | <input type="checkbox"/> 3 Sitting over edge of bed                    |
| <input type="checkbox"/> 4 Standing (with or without assist)           | <input type="checkbox"/> 4 Standing (with or without assist)           |
| <input type="checkbox"/> 5 Transferring bed to chair                   | <input type="checkbox"/> 5 Transferring bed to chair                   |
| <input type="checkbox"/> 6 Marching on spot (at bedside)               | <input type="checkbox"/> 6 Marching on spot (at bedside)               |
| <input type="checkbox"/> 7 Walking with assistance of 2 or more people | <input type="checkbox"/> 7 Walking with assistance of 2 or more people |
| <input type="checkbox"/> 8 Walking with assistance of 1 person         | <input type="checkbox"/> 8 Walking with assistance of 1 person         |
| <input type="checkbox"/> 9 Walking independently with a gait aid       | <input type="checkbox"/> 9 Walking independently with a gait aid       |
| <input type="checkbox"/> 10 Walking independently without a gait aid   | <input type="checkbox"/> 10 Walking independently without a gait aid   |

## Mode and Cannulations

### Initial Mode of ECLS

ECLS Start Date/Time: \_\_\_\_\_ ECLS/Mode Stop Date/Time: \_\_\_\_\_

ECLS mode:  V-A (Venoarterial)  
  V-V (Venovenous)  
  V-VA (Veno - venoarterial)  
  A-VCO2R  
 VV-ECO2R  
  Other  
  Unknown

### Cannulas Placed for the Initial Mode of ECLS

|                          | Cannula #1                                                                                                                      | Cannula #2 | Cannula #3 | Cannula #4 | Cannula #5 |
|--------------------------|---------------------------------------------------------------------------------------------------------------------------------|------------|------------|------------|------------|
|                          | Note: Times will autopopulate with time on and off ECLS.<br>Only note new date/time for cannulas placed/removed during the run. |            |            |            |            |
| Start Date/Time          |                                                                                                                                 |            |            |            |            |
| End Date/Time            |                                                                                                                                 |            |            |            |            |
| Manufacturer             |                                                                                                                                 |            |            |            |            |
| Cannula Model/Size       |                                                                                                                                 |            |            |            |            |
| Pre-Existing?            |                                                                                                                                 |            |            |            |            |
| Percutaneous?            |                                                                                                                                 |            |            |            |            |
| Site (Note if Drain Y/N) |                                                                                                                                 |            |            |            |            |
| Replaced?                |                                                                                                                                 |            |            |            |            |
| Reason?                  |                                                                                                                                 |            |            |            |            |

Please see the Data Definitions document for specific fields' definitions.

## Equipment

| <b>Membrane Lung</b>          | <b>#1</b> | <b>#2</b> | <b>#3</b> |
|-------------------------------|-----------|-----------|-----------|
| Start Date/Time               |           |           |           |
| End Date/Time                 |           |           |           |
| Manufacturer                  |           |           |           |
| Device                        |           |           |           |
| Membrane Replaced?<br>Reason? |           |           |           |
| <b>Blood Pump</b>             | <b>#1</b> | <b>#2</b> | <b>#3</b> |
| Start Date/Time               |           |           |           |
| End Date/Time                 |           |           |           |
| Manufacturer                  |           |           |           |
| Device                        |           |           |           |
| Pump Replaced?<br>Reason?     |           |           |           |

| <b>Other Equipment</b> | <b>Manufacturer</b> | <b>Device</b> |
|------------------------|---------------------|---------------|
| Heat Exchanger         |                     |               |
| Hemofilter             |                     |               |
| Temp Regulation Device |                     |               |

| <b>Membrane Lung</b>          | <b>#4</b> | <b>#5</b> | <b>#6</b> |
|-------------------------------|-----------|-----------|-----------|
| Start Date/Time               |           |           |           |
| End Date/Time                 |           |           |           |
| Manufacturer                  |           |           |           |
| Device                        |           |           |           |
| Membrane Replaced?<br>Reason? |           |           |           |
| <b>Blood Pump</b>             | <b>#4</b> | <b>#5</b> | <b>#6</b> |
| Start Date/Time               |           |           |           |
| End Date/Time                 |           |           |           |
| Manufacturer                  |           |           |           |
| Device                        |           |           |           |
| Pump Replaced?<br>Reason?     |           |           |           |

| <b>Other Equipment</b> | <b>Manufacturer</b> | <b>Device</b> |
|------------------------|---------------------|---------------|
| Heat Exchanger         |                     |               |
| Hemofilter             |                     |               |
| Temp Regulation Device |                     |               |

Duplicate this page as required for multiple changes

**Add New Mode Conversion** (this section to be used only for mode conversions – must enter a Stop Date/Time for the initial mode)

ECLS Start Date/Time: \_\_\_\_\_ ECLS/Mode Stop Date/Time: \_\_\_\_\_

ECLS mode:  V-A (Venoarterial)  V-V (Venovenous)  V-VA (Veno venoarterial)  A-VCO2R  
 VV-ECCO2R  Other  Unknown

| Cannulas Placed for this Mode of ECLS |                                                                                                                         |            |            |            |            |
|---------------------------------------|-------------------------------------------------------------------------------------------------------------------------|------------|------------|------------|------------|
|                                       | Cannula #1                                                                                                              | Cannula #2 | Cannula #3 | Cannula #4 | Cannula #5 |
|                                       | Note: Times will autopopulate with time on and off ECLS.<br>Only note new date/time for cannulas placed during the run. |            |            |            |            |
| Start Date/Time                       |                                                                                                                         |            |            |            |            |
| End Date/Time                         |                                                                                                                         |            |            |            |            |
| Manufacturer                          |                                                                                                                         |            |            |            |            |
| Cannula Model/Size                    |                                                                                                                         |            |            |            |            |
| Pre-Existing?                         |                                                                                                                         |            |            |            |            |
| Percutaneous?                         |                                                                                                                         |            |            |            |            |
| Site (Note if Drain Y/N)              |                                                                                                                         |            |            |            |            |
| Replaced?                             |                                                                                                                         |            |            |            |            |
| Reason?                               |                                                                                                                         |            |            |            |            |

**Add Another Mode Conversion** (this section to be used only for mode conversions – must enter a Stop Date/Time for the previous mode)

ECLS Start Date/Time: \_\_\_\_\_ ECLS/Mode Stop Date/Time: \_\_\_\_\_

ECLS mode:  V-A (Venoarterial)  V-V (Venovenous)  V-VA (Veno venoarterial)  A-VCO2R  
 VV-ECCO2R  Other  Unknown

| Cannulas Placed for this Mode of ECLS |                                                                                                                         |            |            |            |            |
|---------------------------------------|-------------------------------------------------------------------------------------------------------------------------|------------|------------|------------|------------|
|                                       | Cannula #1                                                                                                              | Cannula #2 | Cannula #3 | Cannula #4 | Cannula #5 |
|                                       | Note: Times will autopopulate with time on and off ECLS.<br>Only note new date/time for cannulas placed during the run. |            |            |            |            |
| Start Date/Time                       |                                                                                                                         |            |            |            |            |
| End Date/Time                         |                                                                                                                         |            |            |            |            |
| Manufacturer                          |                                                                                                                         |            |            |            |            |
| Cannula Model/Size                    |                                                                                                                         |            |            |            |            |
| Pre-Existing?                         |                                                                                                                         |            |            |            |            |
| Percutaneous?                         |                                                                                                                         |            |            |            |            |
| Site (Note if Drain Y/N)              |                                                                                                                         |            |            |            |            |
| Replaced?                             |                                                                                                                         |            |            |            |            |
| Reason?                               |                                                                                                                         |            |            |            |            |

Duplicate this page as required for multiple mode changes

**ICD-10 Diagnoses**

Primary Diagnosis: \_\_\_\_\_(check box as primary)

**Secondary Diagnoses: (unlimited)**

|  |  |
|--|--|
|  |  |
|  |  |
|  |  |
|  |  |
|  |  |
|  |  |
|  |  |
|  |  |
|  |  |
|  |  |
|  |  |
|  |  |
|  |  |
|  |  |
|  |  |

**CPT Procedure Codes** (List all relevant procedures related to the patient even if preceding this admission)

| Date/Time | Estimated?<br>Y/N | Code/Procedure |
|-----------|-------------------|----------------|
|           |                   |                |
|           |                   |                |
|           |                   |                |
|           |                   |                |
|           |                   |                |
|           |                   |                |
|           |                   |                |
|           |                   |                |
|           |                   |                |
|           |                   |                |
|           |                   |                |
|           |                   |                |
|           |                   |                |
|           |                   |                |
|           |                   |                |
|           |                   |                |
|           |                   |                |
|           |                   |                |
|           |                   |                |
|           |                   |                |
|           |                   |                |

**ECLS Complications** (Refer to ELSO Data Definitions for Specific Details)

Enter multiple complications of the same type by 'add new complication' with new date/time.  
Complications that 'continue' for several days only need the first date of occurrence.

| Date/Time | Mechanical                         | Definition                                                                                                                                                    |
|-----------|------------------------------------|---------------------------------------------------------------------------------------------------------------------------------------------------------------|
|           | Oxygenator Failure                 | Requiring change due to clot formation or gas exchange failure or blood leak                                                                                  |
|           | Pump Failure                       | Requiring hand cranking or pump exchange                                                                                                                      |
|           | Raceway Rupture                    | In a roller pump rupture of the raceway tubing                                                                                                                |
|           | Other Tubing Rupture               | Rupture of ECLS tubing                                                                                                                                        |
|           | Cannula Problems                   | Requiring intervention (reposition or exchange) for misplacement, dislodgement, replacement due to clots/fibrin, mechanical failure or inappropriate position |
|           | Circuit Change                     | Entire circuit (with exception of cannulae) changed due to clot formation or mechanical failure                                                               |
|           | Heat Exchanger Malfunction         | Malfunction of heat exchanger leading to unintentional hypothermia <35C or hyperthermia >39                                                                   |
|           | Thombosis/Clots: Circuit Component | Circuit component (e.g. pigtails, connectors, bridge, arterial or venous tubing) requiring change due to clot formation or mechanical failure                 |
|           | Clots Hemofilter                   | Clots in hemofilter causing hemofilter to need to be changed or to fail                                                                                       |
|           | Air in Circuit                     | Requiring circuit intervention or circuit clamping for bubble detector alarm, visualized air, air entry into patient                                          |

| Date/Time | Hemorrhage                            | Definition                                                                                                                                                                                                                                                                                                                                                                                                                                                 |
|-----------|---------------------------------------|------------------------------------------------------------------------------------------------------------------------------------------------------------------------------------------------------------------------------------------------------------------------------------------------------------------------------------------------------------------------------------------------------------------------------------------------------------|
|           | GI Hemorrhage                         | Upper or lower GI hemorrhage requiring PRBC transfusion (>20ml/kg/24 hrs of PRBCs or >3U PRBCs/24 hrs in neonates and pediatrics or >3U PRBCs/24 hrs in adults), and/or, endoscopic intervention, and/or hemostatic agent deployment                                                                                                                                                                                                                       |
|           | Peripheral Cannulation Site Bleeding  | Select this complication if there is bleeding from a peripheral cannulation site such as the neck, groin, or axilla.<br><br>Peripheral cannulation site bleeding requiring PRBC transfusion (>20ml/kg/24 hrs of PRBCs or >3U PRBCs/24 hrs in neonates and pediatrics or >3U PRBCs/24 hrs in adults) and/or, surgical intervention (includes intravascular hemostatic agent deployment).<br>A reperfusion cannula is a type of peripheral cannulation site. |
|           | Mediastinal Cannulation Site Bleeding | Select this complication if there is bleeding from cannulae that are placed across the mediastinum.<br><br>Mediastinal cannulations are also referred to as central cannulations and are placed via their mediastinum. Mediastinal cannulation site bleeding requiring PRBC transfusion (>20ml/kg/24 hrs of PRBCs or >3U PRBCs/24 hrs in neonates and pediatrics or >3U PRBCs/24 hrs in adults, and/or surgical intervention.                              |
|           | Surgical Site Bleeding                | Select this complication if there is bleeding from a surgical site other than mediastinal or peripheral cannulation site.<br><br>Requiring PRBC transfusion (>20ml/kg/24 hrs of PRBCs or >3U PRBCs/24 hrs in neonates and pediatrics or >3U PRBCs/24 hrs in adults), and/or surgical intervention                                                                                                                                                          |

| Date/Time | Neurological | Definition                                                                                                                                                        |
|-----------|--------------|-------------------------------------------------------------------------------------------------------------------------------------------------------------------|
|           | Brain Death  | Select this complication if a patient suffered brain death or neurological determination of death.<br><br>Please refer to Data Definitions for specific criteria. |

| Date/Time | Neurological                   | Definition                          |
|-----------|--------------------------------|-------------------------------------|
|           | Seizures Clinically Determined | Clinically determined by assessment |
|           | Seizures Confirmed by EEG      | Confirmed by Electroencephalograph  |

| Date/Time | Neurological                                             | Definition                                                                                                                     |
|-----------|----------------------------------------------------------|--------------------------------------------------------------------------------------------------------------------------------|
|           | CNS Diffuse Ischemia (CT/MRI)                            | CT or MRI demonstrating diffuse ischemic changes                                                                               |
|           | CNS Infarction (US or CT or MRI)                         | CT or US or MRI demonstrating localized ischemic change                                                                        |
|           | Intra/extra Parenchymal CNS Hemorrhage (US or CT or MRI) | May be intraparenchymal, subdural or subarachnoid                                                                              |
|           | Intraventricular CNS Hemorrhage (US or CT or MRI)        | >= Grade 2 IVH on US, CT or MRI                                                                                                |
|           | Neurosurgical intervention performed                     | Neurosurgical procedure performed during ECLS run (e.g. intracranial pressure monitor, external ventricular drain, craniotomy) |

| Date/Time | Renal                              | Definition                                                                                                                                                                                                                                       |
|-----------|------------------------------------|--------------------------------------------------------------------------------------------------------------------------------------------------------------------------------------------------------------------------------------------------|
|           | Creatinine 1.5 – 3.0               | After ECMO start time, patient newly acquires a creatinine serum measurement of 1.5- 3.0                                                                                                                                                         |
|           | Creatinine > 3.0                   | After ECMO start time, patient newly acquires a creatinine serum measurement of >3.0                                                                                                                                                             |
|           | Renal Replacement Therapy Required | Peritoneal Dialysis (PD), Continuous Venovenous Hemodiafiltration (CVVHD), Continuous Venovenous Hemofiltration (CVVHF) or Continuous Venovenous Hemodiafiltration (CVVHDF) or Hemodialysis (HD) based on the patient's ultimate mode of therapy |

| Date/Time | Cardiovascular        | Definition                                                                                      |
|-----------|-----------------------|-------------------------------------------------------------------------------------------------|
|           | CPR Required          | Chest compressions and cardiopulmonary resuscitation required during ECLS run                   |
|           | Cardiac Arrhythmia    | Requiring antiarrhythmic medication infusion, overdrive pacing, cardioversion or defibrillation |
|           | Tamponade (not blood) | Tamponade during ECLS run requiring pericardial drain or mediastinal washout                    |
|           | Tamponade (blood)     | Tamponade during ECLS run requiring pericardial drain or mediastinal washout                    |

| Date/Time | Pulmonary            | Definition                                                                                                                         |
|-----------|----------------------|------------------------------------------------------------------------------------------------------------------------------------|
|           | Pneumothorax         | Requiring insertion of chest drain                                                                                                 |
|           | Pulmonary Hemorrhage | Requiring pRBC transfusion(>20ml/kg/24 hrs of PRBCs or >3U PRBCs/24 hrs in neonates and pediatrics and >3U PRBCs/24 hrs in adults) |

| Date/Time | Metabolic          | Definition                                                                                                                                                                                                                                                                           |
|-----------|--------------------|--------------------------------------------------------------------------------------------------------------------------------------------------------------------------------------------------------------------------------------------------------------------------------------|
|           | Hyperbilirubinemia | For neonatal patients (< 28 days) = conjugated bilirubin >20umol/L (>1.2mg/dL).<br>For pediatric (>30days) or adult patients = total bilirubin >170umol/L (> 10mg/dL) or conjugated bilirubin >51umol/L (>3mg/dL),<br>Or need for extracorporeal purification for elevated bilirubin |
|           | Moderate Hemolysis | Peak plasma hemoglobin 50-100 mg/dL or 500-1000 mg/L occurring at least once during ECLS run. Sustained for at least 2 consecutive days                                                                                                                                              |
|           | Severe Hemolysis   | Peak plasma hemoglobin > 100mg/dL or >1000 mg/L occurring at least once during ECLS run. Sustained for at least 2 consecutive days                                                                                                                                                   |

| Date/Time | Patient Limb                                     | Definition                                                                                                                      |
|-----------|--------------------------------------------------|---------------------------------------------------------------------------------------------------------------------------------|
|           | Fasciotomy                                       | Fasciotomy performed secondary to compartment syndrome from ECLS cannulation (fasciotomy performed during ECLS hospitalization) |
|           | Limb Amputation                                  | Limb amputation secondary to complications from ECLS run (amputation performed during ECLS hospitalization)                     |
|           | Limb Ischemia Requiring Limb Reperfusion Cannula | Post peripheral cannulation, requiring addition of limb reperfusion cannula >=6 hrs post cannulation                            |



**Infections** (pre and those occurring on ECMO)

| Date/Time/Estimated? | Culture Site | Organism Type | Organism |
|----------------------|--------------|---------------|----------|
|                      |              |               |          |
|                      |              |               |          |
|                      |              |               |          |
|                      |              |               |          |

Sites: Blood, Bone, Cerebrospinal fluid, Peritoneal fluid, Pleural fluid, Respiratory tract, Skin/soft tissue, Stool, Urine, Wound – surgical, Wound – traumatic, Other, Unknown

Type: All, Unknown, Gram + Bacteria, Gram – Bacteria, Mycobacterium, Fungus (yeast and mold), Viruses and Prions, Protozoa

Organisms are listed in the Data Definitions. If an organism is not listed, please contact prycus@elso.org

**Outcomes****Discontinuation Reason** (Why the patient was separated from ECLS)

- |                                              |                                                          |
|----------------------------------------------|----------------------------------------------------------|
| <input type="checkbox"/> Unknown             | <input type="checkbox"/> Transition to VAD Support       |
| <input type="checkbox"/> Expected recovery   | <input type="checkbox"/> Pumpless Lung Assist (Pa to LA) |
| <input type="checkbox"/> Poor prognosis      | <input type="checkbox"/> Heart transplant                |
| <input type="checkbox"/> Resource limitation | <input type="checkbox"/> Lung transplant                 |
| <input type="checkbox"/> ECLS complication   | <input type="checkbox"/> Heart and lung transplant       |

**Cannulation Repair**

- |                                                |                                                   |
|------------------------------------------------|---------------------------------------------------|
| <input type="checkbox"/> None                  | <input type="checkbox"/> Common Carotid Artery    |
| <input type="checkbox"/> Internal Jugular Vein | <input type="checkbox"/> Both Carotid and Jugular |
| <input type="checkbox"/> Other                 |                                                   |

**Extubated**

- |                                                                 |                                                           |
|-----------------------------------------------------------------|-----------------------------------------------------------|
| <input type="checkbox"/> Endotracheally extubated $\geq$ 48 hrs | <input type="checkbox"/> N/A - Tracheostomy               |
| <input type="checkbox"/> N/A - Transferred intubated            | <input type="checkbox"/> N/A - Intubated at time of death |
| <input type="checkbox"/> N/A - Other                            |                                                           |

Oral Endotracheal Tube Removed Date/Time: \_\_\_\_\_

**Discharged Alive**

- Yes       No       On ECMO

ICU Discharge Date/Time: \_\_\_\_\_

Hospital Discharge Date/Time: \_\_\_\_\_

Death Date/Time: \_\_\_\_\_

**Discharge Location**

- |                                                        |                                                                 |
|--------------------------------------------------------|-----------------------------------------------------------------|
| <input type="checkbox"/> Home                          | <input type="checkbox"/> Transferred to Long Term Care or Rehab |
| <input type="checkbox"/> Transferred to Other Hospital | <input type="checkbox"/> Transfer to Hospice                    |
| <input type="checkbox"/> Other                         | <input type="checkbox"/> Unknown                                |

Form completed by: \_\_\_\_\_ *Completed date is automatically added when you submit the run.*

Select Validate Data – to assure mandatory fields complete, dates are correct.

Select Submit and Lock – to finalize the record and submit to ELSO.

**Supplemental Table 1: Complications**

|                                                                      |
|----------------------------------------------------------------------|
| Mechanical: Oxygenator failure                                       |
| Mechanical: Raceway rupture                                          |
| Mechanical: Other tubing rupture                                     |
| Mechanical: Pump Failure                                             |
| Mechanical: Heat exchanger malfunction                               |
| Mechanical: Clots: hemofilter                                        |
| Mechanical: Air in circuit                                           |
| Mechanical: Cannula problems                                         |
| Mechanical: Circuit change                                           |
| Mechanical: Clots and Air Emboli                                     |
| Mechanical: Thrombosis/Clots: circuit component                      |
| Hemorrhagic: GI hemorrhage                                           |
| Hemorrhagic: Surgical site bleeding                                  |
| Hemorrhagic: Peripheral cannulation site bleeding                    |
| Hemorrhagic: Mediastinal cannulation site bleeding                   |
| Neurologic: Brain death                                              |
| Neurologic: Seizures: clinically determined                          |
| Neurologic: Seizures Confirmed by EEG                                |
| Neurologic: CNS Infarction (US or CT or MRI)                         |
| Neurologic: Intraventricular CNS hemorrhage (US or CT or MRI)        |
| Neurologic: Intra/extra parenchymal CNS Hemorrhage (US or CT or MRI) |
| Neurologic: CNS diffuse ischemia (CT/MRI)                            |
| Neurologic: Neurosurgical intervention performed                     |
| Renal: Creatinine 1.5 - 3.0                                          |
| Renal: Creatinine > 3.0                                              |
| Renal: Renal Replacement Therapy Required                            |
| Cardiovascular: CPR required                                         |
| Cardiovascular: Cardiac arrhythmia                                   |
| Cardiovascular: Tamponade (blood)                                    |
| Cardiovascular: Tamponade (not blood)                                |
| Pulmonary: Pneumothorax requiring treatment                          |
| Pulmonary: Pulmonary hemorrhage                                      |
| Infectious: WBC < 1,500                                              |
| Metabolic: Hyperbilirubinemia                                        |
| Metabolic: Moderate hemolysis                                        |
| Metabolic: Severe hemolysis                                          |
| Limb: Ischemia                                                       |
| Limb: Compartment Syndrome                                           |
| Limb: Fasciotomy                                                     |
| Limb: Amputation                                                     |

**Supplemental Table 2: Missing data**

| <b>Patient Characteristics</b>    | <b>On-hours<br/>(n = 4331)</b> | <b>Off-hours<br/>(n=5069)</b> |
|-----------------------------------|--------------------------------|-------------------------------|
|                                   |                                |                               |
| Sex                               | 1%                             | 2.8%                          |
| Age                               | 0%                             | 0%                            |
| Race                              | 0%                             | 0%                            |
| Time from admission to intubation | 7.1%                           | 8.9%                          |
| Time from intubation to ECLS      | 6.7%                           | 8.7%                          |
| <b>Pre ECLS characteristics</b>   |                                |                               |
| Systolic blood pressure           | 25.6%                          | 21.6%                         |
| pH                                | 16.5%                          | 15.4%                         |
| pCO2                              | 17.0%                          | 16.1%                         |
| pO2                               | 17.5%                          | 16.4%                         |
| CPB                               | 0%                             | 0%                            |
| <b>ECLS run characteristics</b>   |                                |                               |
| Mode                              | 0.9%                           | 1.2%                          |
| Support type                      | 0%                             | 0%                            |

CPB = cardiopulmonary by-pass

**Supplemental Table 3:** Results of multivariable model for different outcomes for off hours versus on hour cannulation not including predictors that were missing in >10% (n=8497)

| Outcomes                | Model          | Point estimate | 95% CI     | p-value |
|-------------------------|----------------|----------------|------------|---------|
| Hospital mortality      | logistic       | 0.99           | 0.91-1.09  | 0.99    |
| Any complication        | logistic       | 10.7           | 0.94-1.22  | 0.29    |
| Number of complications | linear         | 0.03           | -0.06-0.13 | 0.49    |
|                         |                |                |            |         |
| Specific complications* |                |                |            |         |
| Mechanical              | logistic       | 1.09           | 0.91-1.30  | 0.19    |
| Hemorrhagic             | logistic       | 0.99           | 0.84-1.17  | 0.90    |
| Neurologic              | logistic       | 1.22           | 0.99-1.48  | 0.006   |
| Renal                   | logistic       | 1.0            | 0.82-1.23  | 0.96    |
| Cardiovascular          | logistic       | 1.02           | 0.85-1.22  | 0.85    |
| Pulmonary               | logistic       | 0.96           | 0.76-1.23  | 0.68    |
| Metabolic               | logistic       | 0.93           | 0.76-1.33  | 0.31    |
| Limb                    | logistic       | 0.83           | 0.30-2.31  | 0.62    |
|                         |                |                |            |         |
|                         |                |                |            |         |
| Hours on ECLS           | competing risk | 1.0            | 0.95-1.06  | 0.93    |
| LOS                     | competing risk | 1.02           | 0.97-1.08  | 0.46    |

\*Bonferroni correction for specific complications, p-value < 0.006, 99.4% CI

LOS = length of stay

Adjusted for age, sex, race, ECLS type (pulmonary, cardiac, ECPR), time to intubation, time from intubation to ECLS, number of CCC, number of inotropes/vasopressors

All models took clustering on center level (random effect) into account

Point estimate for logistic model is odds ratio, for linear model is the linear coefficient and for LOS sub-hazard ratio for discharge, for hours on ECLS it is the sub-hazard ratio for coming off ECLS

**Supplemental Table 4:** P-values for interaction between on/off hour cannulation, mortality and complications (complete case analysis, n=6144)

| Outcome     | Mortality | Any complications | Number of complications | Hours on ELCS | LOS       |
|-------------|-----------|-------------------|-------------------------|---------------|-----------|
| <b>Mode</b> |           |                   |                         |               |           |
| VV          | reference | reference         | reference               | reference     | reference |
| VA          | 0.80      | <b>0.019*</b>     | 0.20                    | 0.47          | 0.59      |
| <b>Type</b> |           |                   |                         |               |           |
| Pulmonary   | reference | reference         | reference               | reference     | reference |
| Cardiac     | 0.41      | 0.56              | 0.82                    | 0.79          | 0.80      |
| ECPR        | 0.83      | 0.11              | 0.71                    | 0.79          | 0.67      |

Adjusted for age, sex, race, time to intubation, time from intubation to ECLS, number of CCC, pre-ecls blood pressure, pH and pO<sub>2</sub>

All models took clustering on center level into account
